# Supplementary material for: Diabetic Ketoacidosis Was Associated with High Morbidity and Mortality in Hospitalized Patients with COVID-19 in the NYC Public Health System
Source: MDPI journal article supplement (doi:10.3390/diabetology3030036), 2022-09-06
Supplement: s1 [file s1]

# Supplementary material for the paper:

## High Mortality and Morbidity associated with Covid-19 infection and presentation with Diabetic Ketoacidosis in a large New York City public health system

Contains:

### Graphs concerning the quality of the matching technique used:

- Figure S1. Extent of covariate imbalance in terms of standardized percentage differences before and after matching
- Figure S2. Propensity scores, subject-specific probability of mortality (A) before matching and (B) after matching.

### Statistics:

- Table S1. Correlation matrix of disorders (N=22,694)
- Table S2. Correlation matrix of disorders in DKA Cohort (N=422)

### Regression analysis for the outcome of intubation:

- Table S3. Baseline patient characteristics: Univariate and multivariate logistic regression analysis for the outcome of intubation
- Table S4. COVID-19 Cohort: Univariate and multivariate logistic regression analysis for the outcome of intubation
- Table S5. DKA Cohort: Univariate and multivariate logistic regression analysis for the outcome of intubation

### Regression analysis for the outcome of ICU admission:

- Table S6. Baseline patient characteristics: Univariate and multivariate logistic regression analysis for the outcome of ICU admission
- Table S7. COVID-19 Cohort: Univariate and multivariate logistic regression analysis for the outcome of ICU admission
- Table S8. DKA Cohort: Univariate and multivariate logistic regression analysis for the outcome of ICU admission

### Regression analysis for the outcome of Renal Replacement Therapy:

- Table S9. Baseline patient characteristics: Univariate and multivariate logistic regression analysis for the outcome of Renal Replacement Therapy

- **Table S10. COVID-19 Cohort: Univariate and multivariate logistic regression analysis for the outcome of Renal Replacement Therapy**
- **Table S11. DKA Cohort: Univariate and multivariate logistic regression analysis for the outcome of Renal Replacement Therapy**

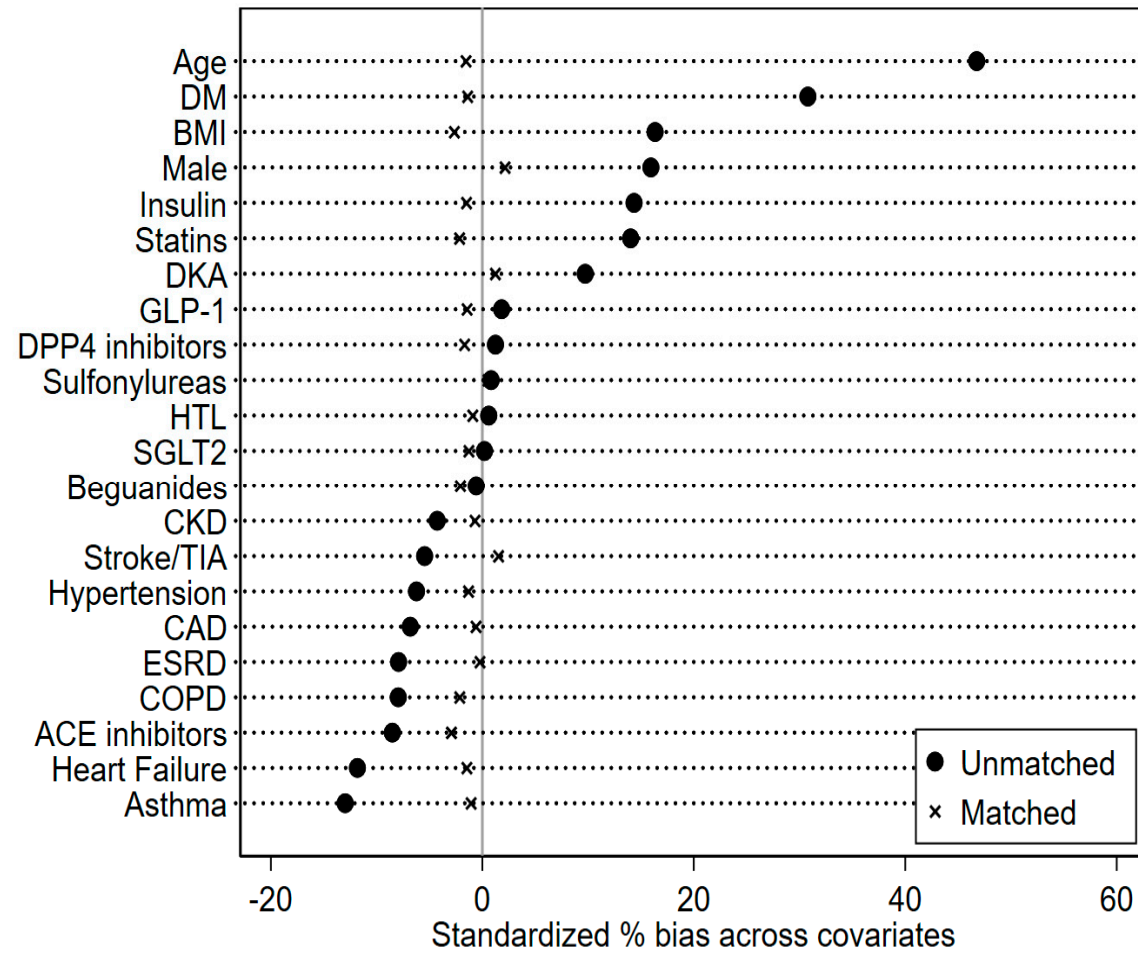

Figure S1. Extent of covariate imbalance in terms of standardized percentage differences before and after matching

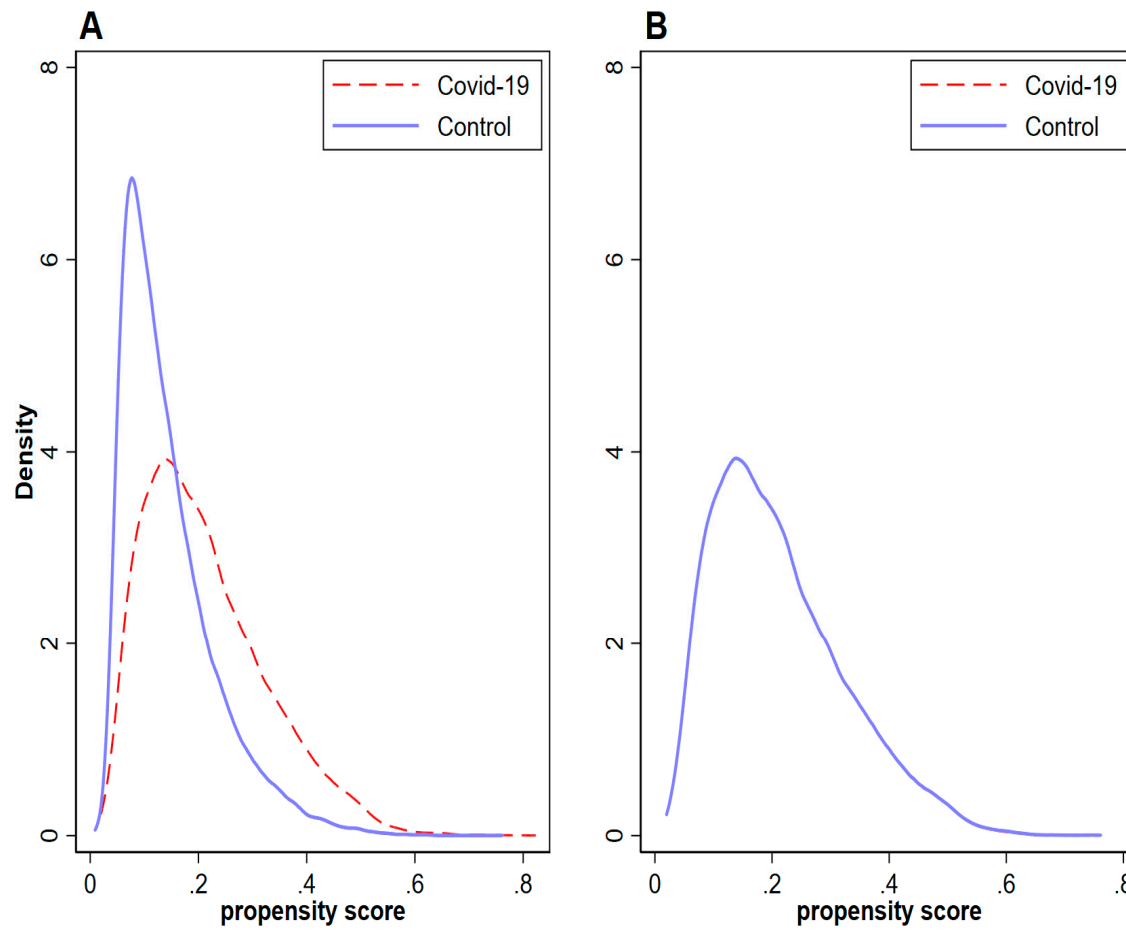

Figure S2. Propensity scores, subject-specific probability of mortality (A) before matching and (B) after matching.

**Table S1. Correlation matrix of disorders (N=22,694)**

|                        | Diabetic<br>Ketoacidosis | History<br>of DM | Type 1<br>Diabetes | HTN    | HLD    | Pulmonary<br>HTN | COPD   | Asthma | CAD    | Heart<br>Failure | Stroke/TIA | ESRD   | Chronic<br>Kidney<br>Disease |
|------------------------|--------------------------|------------------|--------------------|--------|--------|------------------|--------|--------|--------|------------------|------------|--------|------------------------------|
| Diabetic Ketoacidosis  | 1                        |                  |                    |        |        |                  |        |        |        |                  |            |        |                              |
| History of DM          | 0.1558                   | 1                |                    |        |        |                  |        |        |        |                  |            |        |                              |
| Type 1 Diabetes        | 0.378                    | 0.0888           | 1                  |        |        |                  |        |        |        |                  |            |        |                              |
| HTN                    | 0.0029                   | 0.2452           | 0.0022             | 1      |        |                  |        |        |        |                  |            |        |                              |
| HLD                    | 0.0064                   | 0.1953           | 0.0001             | 0.4047 | 1      |                  |        |        |        |                  |            |        |                              |
| Pulmonary HTN          | -0.0048                  | 0.0163           | -0.0054            | 0.0652 | 0.0571 | 1                |        |        |        |                  |            |        |                              |
| COPD                   | -0.0178                  | 0.0367           | -0.0115            | 0.1318 | 0.0857 | 0.0347           | 1      |        |        |                  |            |        |                              |
| Asthma                 | -0.0083                  | 0.0425           | 0.0001             | 0.1514 | 0.1211 | 0.0169           | 0.1316 | 1      |        |                  |            |        |                              |
| CAD                    | -0.0153                  | 0.0981           | -0.0076            | 0.1924 | 0.1633 | 0.0318           | 0.0696 | 0.0533 | 1      |                  |            |        |                              |
| Heart Failure          | -0.0098                  | 0.0986           | -0.0038            | 0.2095 | 0.1462 | 0.1195           | 0.1546 | 0.0878 | 0.1895 | 1                |            |        |                              |
| Stroke/TIA             | -0.0075                  | 0.0546           | 0.0105             | 0.0901 | 0.0866 | 0.0309           | 0.0259 | 0.0188 | 0.0387 | 0.0332           | 1          |        |                              |
| ESRD                   | -0.0019                  | 0.0961           | 0.0073             | 0.1926 | 0.0727 | 0.0494           | 0.0435 | 0.0142 | 0.0838 | 0.1547           | 0.0261     | 1      |                              |
| Chronic Kidney Disease | 0.0057                   | 0.1398           | 0.0067             | 0.2784 | 0.17   | 0.0561           | 0.0628 | 0.0299 | 0.1402 | 0.2224           | 0.0587     | 0.2541 | 1                            |

**Table S2. Correlation matrix of disorders in DKA Cohort (N=422)**

|                        | Type 1<br>Diabetes | HTN     | HLD     | Pulmonary<br>HTN | COPD   | Asthma  | CAD    | Heart Failure | Stroke/TIA | ESRD   | Chronic Kidney<br>Disease |
|------------------------|--------------------|---------|---------|------------------|--------|---------|--------|---------------|------------|--------|---------------------------|
| Type 1 Diabetes        | 1                  |         |         |                  |        |         |        |               |            |        |                           |
| HTN                    | 0.0025             | 1       |         |                  |        |         |        |               |            |        |                           |
| HLD                    | -0.054             | 0.3704  | 1       |                  |        |         |        |               |            |        |                           |
| Pulmonary HTN          | -0.0259            | 0.088   | -0.0168 | 1                |        |         |        |               |            |        |                           |
| COPD                   | -0.0259            | 0.088   | -0.0168 | -0.002           | 1      |         |        |               |            |        |                           |
| Asthma                 | 0.0376             | 0.1278  | 0.0273  | -0.009           | 0.2734 | 1       |        |               |            |        |                           |
| CAD                    | -0.0054            | 0.1461  | 0.1041  | -0.005           | -0.005 | -0.0195 | 1      |               |            |        |                           |
| Heart Failure          | -0.0457            | 0.2122  | 0.1726  | -0.01            | -0.01  | 0.0364  | 0.0929 | 1             |            |        |                           |
| Stroke/TIA             | 0.0911             | -0.0468 | -0.0292 | -0.004           | -0.004 | -0.0151 | -0.009 | -0.0168       | 1          |        |                           |
| ESRD                   | 0.0009             | 0.2706  | 0.079   | 0.2309           | -0.01  | -0.0376 | 0.0853 | 0.2037        | -0.018     | 1      |                           |
| Chronic Kidney Disease | 0.0364             | 0.2254  | 0.1186  | 0.1794           | -0.013 | 0.1684  | -0.03  | 0.2403        | 0.0885     | 0.1281 | 1                         |

**Table S3. Baseline patient characteristics: Univariate and multivariate logistic regression analysis for the outcome of intubation**

| Variables              | Univariate Analysis          | Multivariate Analysis        | Multivariate Analysis        | Multivariate Analysis        | Multivariate Analysis        |
|------------------------|------------------------------|------------------------------|------------------------------|------------------------------|------------------------------|
|                        |                              | Model 1                      | Model 2                      | Model 3                      | Model 4                      |
|                        |                              | n=22,694                     | n=22,694                     | n=22,694                     | n=22,694                     |
|                        | OR (95% CI), p- value        |
| Age per 10             | 1.12** (1.09 - 1.15) p<0.001 | 1.17** (1.14 - 1.21) p<0.001 | 1.15** (1.11 - 1.19) p<0.001 | 1.18** (1.14 - 1.22) p<0.001 | 1.11** (1.07 - 1.16) p<0.001 |
| Male                   | 1.52** (1.35 - 1.70) p<0.001 | 1.65** (1.47 - 1.85) p<0.001 | 1.63** (1.45 - 1.83) p<0.001 | 1.65** (1.46 - 1.85) p<0.001 | 1.49** (1.31 - 1.69) p<0.001 |
| BMI                    | 1.01** (1.01 - 1.02) p<0.001 | 1.03** (1.02 - 1.03) p<0.001 | 1.02** (1.02 - 1.03) p<0.001 | 1.03** (1.02 - 1.03) p<0.001 | 1.02** (1.01 - 1.03) p<0.001 |
| Covid-19               | 2.90** (2.57 - 3.27) p<0.001 | 2.95** (2.61 - 3.33) p<0.001 | 2.98** (2.64 - 3.37) p<0.001 | 2.93** (2.60 - 3.32) p<0.001 | 2.04** (1.78 - 2.35) p<0.001 |
| Diabetic Ketoacidosis  | 1.78** (1.29 - 2.44) p<0.001 | 2.00** (1.45 - 2.78) p<0.001 | 1.37 (0.98 - 1.91) p=0.067   | 1.36 (0.97 - 1.91) p=0.074   | 1.35 (0.95 - 1.92) p=0.097   |
| History of DM          | 2.17** (1.95 - 2.43) p<0.001 |                              | 2.16** (1.92 - 2.43) p<0.001 | 2.44** (2.12 - 2.82) p<0.001 | 1.64** (1.41 - 1.91) p<0.001 |
| Type 1 Diabetes        | 1.17 (0.61 - 2.23) p=0.636   |                              | 0.91 (0.47 - 1.79) p=0.795   | 0.86 (0.44 - 1.69) p=0.662   | 1.02 (0.50 - 2.04) p=0.966   |
| Hypertension           | 0.84* (0.74 - 0.96) p=0.012  |                              | 0.69** (0.59 - 0.81) p<0.001 | 0.74** (0.63 - 0.87) p<0.001 | 0.76** (0.65 - 0.90) p=0.001 |
| Hyperlipidemia         | 0.85 (0.69 - 1.03) p=0.096   |                              | 0.83 (0.67 - 1.03) p=0.094   | 0.99 (0.79 - 1.23) p=0.900   | 1.12 (0.89 - 1.41) p=0.350   |
| Pulmonary Hypertension | 0.43 (0.14 - 1.35) p=0.149   |                              | 0.51 (0.17 - 1.53) p=0.228   | 0.48 (0.16 - 1.45) p=0.193   | 0.43 (0.14 - 1.33) p=0.142   |
| COPD                   | 0.80 (0.53 - 1.21) p=0.291   |                              | 0.91 (0.59 - 1.41) p=0.678   | 0.94 (0.61 - 1.46) p=0.792   | 0.66 (0.42 - 1.03) p=0.069   |
| Asthma                 | 0.68* (0.50 - 0.93) p=0.017  |                              | 0.82 (0.59 - 1.13) p=0.223   | 0.81 (0.59 - 1.13) p=0.216   | 0.63** (0.45 - 0.87) p=0.006 |
| CAD                    | 0.78 (0.55 - 1.10) p=0.155   |                              | 0.72 (0.50 - 1.04) p=0.078   | 0.79 (0.55 - 1.14) p=0.201   | 0.87 (0.60 - 1.27) p=0.473   |
| Heart Failure          | 0.89 (0.70 - 1.15) p=0.377   |                              | 0.84 (0.64 - 1.11) p=0.222   | 0.91 (0.69 - 1.20) p=0.509   | 1.04 (0.78 - 1.38) p=0.779   |
| Stroke/TIA             | 0.89 (0.54 - 1.46) p=0.645   |                              | 0.81 (0.49 - 1.34) p=0.409   | 0.90 (0.54 - 1.50) p=0.686   | 1.13 (0.67 - 1.88) p=0.650   |
| ESRD                   | 1.47** (1.17 - 1.84) p=0.001 |                              | 1.61** (1.26 - 2.05) p<0.001 | 1.55** (1.21 - 2.00) p=0.001 | 1.27 (0.98 - 1.65) p=0.076   |
| Chronic Kidney Disease | 1.08 (0.86 - 1.35) p=0.512   |                              | 0.94 (0.73 - 1.20) p=0.609   | 0.95 (0.74 - 1.23) p=0.712   | 1.03 (0.79 - 1.33) p=0.849   |
| Biguanides             | 0.71** (0.57 - 0.87) p=0.001 |                              |                              | 0.64** (0.51 - 0.80) p<0.001 | 0.79 (0.62 - 1.01) p=0.058   |
| DPP4-inhibitors        | 0.81 (0.65 - 1.01) p=0.060   |                              |                              | 0.74* (0.59 - 0.93) p=0.011  | 0.81 (0.63 - 1.04) p=0.092   |
| SGLT-2 inhibitors      | 1.51 (0.54 - 4.22) p=0.434   |                              |                              | 2.56 (0.83 - 7.90) p=0.103   | 2.90 (0.88 - 9.53) p=0.080   |
| GLP-1 agonists         | 0.64 (0.30 - 1.37) p=0.251   |                              |                              | 0.65 (0.30 - 1.38) p=0.261   | 0.69 (0.33 - 1.44) p=0.321   |
| Insulin                | 1.45** (1.30 - 1.61) p<0.001 |                              |                              | 1.16* (1.00 - 1.33) p=0.050  | 1.17* (1.01 - 1.35) p=0.040  |
| ACE inhibitors         | 0.88 (0.77 - 1.01) p=0.072   |                              |                              | 0.87 (0.75 - 1.00) p=0.053   | 0.97 (0.83 - 1.13) p=0.689   |
| Sulfonylureas          | 0.64 (0.39 - 1.04) p=0.071   |                              |                              | 0.64 (0.39 - 1.06) p=0.081   | 0.69 (0.41 - 1.14) p=0.150   |
| Statins                | 0.89* (0.80 - 0.99) p=0.036  |                              |                              | 0.67** (0.59 - 0.76) p<0.001 | 0.62** (0.54 - 0.70) p<0.001 |
| Heparin                | 2.27** (2.03 - 2.54) p<0.001 |                              |                              |                              | 1.74** (1.52 - 2.00) p<0.001 |
| Enoxaparin             | 1.73** (1.54 - 1.93) p<0.001 |                              |                              |                              | 1.12 (0.97 - 1.29) p=0.116   |
| Apixaban               | 1.22* (1.04 - 1.44) p=0.017  |                              |                              |                              | 0.77** (0.64 - 0.92) p=0.005 |
| Steroids               | 6.72** (6.00 - 7.52) p<0.001 |                              |                              |                              | 4.49** (3.93 - 5.12) p<0.001 |
| Tocilizumab            | 2.77** (2.20 - 3.49) p<0.001 |                              |                              |                              | 0.86 (0.65 - 1.13) p=0.276   |
| Remdesivir             | 2.75** (2.09 - 3.64) p<0.001 |                              |                              |                              | 0.93 (0.68 - 1.27) p=0.640   |
| Convalescent Plasma    | 4.12** (3.32 - 5.12) p<0.001 |                              |                              |                              | 0.85 (0.64 - 1.11) p=0.230   |
| Cafepime               | 5.82** (5.17 - 6.56) p<0.001 |                              |                              |                              | 2.82** (2.44 - 3.25) p<0.001 |

**Table S4. COVID-19 Cohort: Univariate and multivariate logistic regression analysis for the outcome of intubation**

| Variables              | Univariate Analysis          | Multivariate Analysis        | Multivariate Analysis        | Multivariate Analysis        | Multivariate Analysis        |
|------------------------|------------------------------|------------------------------|------------------------------|------------------------------|------------------------------|
|                        |                              | Model 1                      | Model 2                      | Model 3                      | Model 4                      |
|                        |                              | n=11,371                     | n=11,371                     | n=11,371                     | n=11,371                     |
|                        | OR (95% CI), p- value        |
| Age per 10             | 1.10** (1.06 - 1.13) p<0.001 | 1.13** (1.09 - 1.17) p<0.001 | 1.11** (1.06 - 1.15) p<0.001 | 1.13** (1.08 - 1.17) p<0.001 | 1.08** (1.03 - 1.13) p=0.002 |
| Male                   | 1.53** (1.35 - 1.74) p<0.001 | 1.72** (1.49 - 1.97) p<0.001 | 1.71** (1.48 - 1.96) p<0.001 | 1.72** (1.49 - 1.98) p<0.001 | 1.49** (1.28 - 1.73) p<0.001 |
| BMI                    | 1.02** (1.01 - 1.03) p<0.001 | 1.03** (1.02 - 1.04) p<0.001 | 1.03** (1.02 - 1.04) p<0.001 | 1.03** (1.02 - 1.04) p<0.001 | 1.02** (1.01 - 1.03) p<0.001 |
| Diabetic Ketoacidosis  | 1.86** (1.32 - 2.63) p<0.001 | 1.84** (1.26 - 2.69) p=0.002 | 1.33 (0.90 - 1.97) p=0.155   | 1.33 (0.89 - 1.99) p=0.164   | 1.27 (0.84 - 1.92) p=0.260   |
| History of DM          | 2.23** (1.98 - 2.52) p<0.001 |                              | 2.11** (1.84 - 2.43) p<0.001 | 2.37** (2.01 - 2.79) p<0.001 | 1.51** (1.27 - 1.80) p<0.001 |
| Type 1 Diabetes        | 1.37 (0.65 - 2.87) p=0.407   |                              | 0.62 (0.24 - 1.56) p=0.307   | 0.61 (0.24 - 1.54) p=0.294   | 0.71 (0.29 - 1.76) p=0.464   |
| Hypertension           | 0.85* (0.73 - 0.99) p=0.040  |                              | 0.74** (0.62 - 0.89) p=0.002 | 0.80* (0.66 - 0.97) p=0.022  | 0.78* (0.64 - 0.95) p=0.013  |
| Hyperlipidemia         | 0.84 (0.67 - 1.04) p=0.111   |                              | 0.87 (0.67 - 1.12) p=0.273   | 1.00 (0.77 - 1.31) p=0.985   | 1.16 (0.87 - 1.53) p=0.312   |
| Pulmonary Hypertension | 0.45 (0.11 - 1.88) p=0.275   |                              | 0.51 (0.14 - 1.85) p=0.302   | 0.47 (0.13 - 1.74) p=0.260   | 0.44 (0.11 - 1.67) p=0.226   |
| COPD                   | 0.65 (0.39 - 1.10) p=0.111   |                              | 0.89 (0.51 - 1.54) p=0.671   | 0.91 (0.53 - 1.59) p=0.745   | 0.69 (0.39 - 1.23) p=0.207   |
| Asthma                 | 0.63* (0.44 - 0.91) p=0.013  |                              | 0.82 (0.56 - 1.20) p=0.297   | 0.82 (0.56 - 1.20) p=0.305   | 0.69 (0.46 - 1.02) p=0.065   |
| CAD                    | 0.74 (0.50 - 1.10) p=0.138   |                              | 0.75 (0.49 - 1.16) p=0.198   | 0.81 (0.53 - 1.25) p=0.350   | 0.92 (0.59 - 1.42) p=0.702   |
| Heart Failure          | 0.72* (0.53 - 0.99) p=0.043  |                              | 0.68* (0.48 - 0.96) p=0.029  | 0.73 (0.51 - 1.04) p=0.080   | 0.90 (0.63 - 1.29) p=0.556   |
| Stroke/TIA             | 0.75 (0.42 - 1.35) p=0.342   |                              | 0.77 (0.42 - 1.41) p=0.400   | 0.86 (0.47 - 1.57) p=0.622   | 1.06 (0.58 - 1.94) p=0.844   |
| ESRD                   | 1.53** (1.18 - 1.97) p=0.001 |                              | 1.84** (1.38 - 2.45) p<0.001 | 1.80** (1.34 - 2.42) p<0.001 | 1.32 (0.98 - 1.79) p=0.070   |
| Chronic Kidney Disease | 1.07 (0.83 - 1.39) p=0.595   |                              | 0.89 (0.66 - 1.20) p=0.446   | 0.91 (0.67 - 1.23) p=0.543   | 0.99 (0.72 - 1.35) p=0.931   |
| Biguanides             | 0.76* (0.60 - 0.95) p=0.018  |                              |                              | 0.71* (0.54 - 0.93) p=0.013  | 0.93 (0.70 - 1.24) p=0.639   |
| DPP4-inhibitors        | 0.79 (0.61 - 1.01) p=0.058   |                              |                              | 0.72* (0.55 - 0.95) p=0.022  | 0.81 (0.60 - 1.10) p=0.172   |
| SGLT-2 inhibitors      | 2.85* (1.06 - 7.70) p=0.038  |                              |                              | 4.30* (1.14 - 16.19) p=0.031 | 4.55* (1.06 - 19.55) p=0.042 |
| GLP-1 agonists         | 0.71 (0.31 - 1.64) p=0.425   |                              |                              | 0.65 (0.27 - 1.61) p=0.355   | 0.70 (0.28 - 1.75) p=0.442   |
| Insulin                | 1.39** (1.23 - 1.56) p<0.001 |                              |                              | 1.07 (0.91 - 1.27) p=0.418   | 1.11 (0.94 - 1.32) p=0.230   |
| ACE inhibitors         | 0.86 (0.74 - 1.00) p=0.056   |                              |                              | 0.85 (0.71 - 1.01) p=0.064   | 0.97 (0.81 - 1.17) p=0.752   |
| Sulfonylureas          | 0.93 (0.60 - 1.44) p=0.746   |                              |                              | 0.85 (0.50 - 1.44) p=0.550   | 0.86 (0.49 - 1.51) p=0.605   |
| Statins                | 0.89 (0.79 - 1.00) p=0.053   |                              |                              | 0.74** (0.64 - 0.86) p<0.001 | 0.65** (0.56 - 0.77) p<0.001 |
| Heparin                | 2.53** (2.23 - 2.86) p<0.001 |                              |                              |                              | 1.79** (1.53 - 2.09) p<0.001 |
| Enoxaparin             | 1.28** (1.13 - 1.46) p<0.001 |                              |                              |                              | 1.09 (0.92 - 1.29) p=0.307   |
| Apixaban               | 1.12 (0.94 - 1.34) p=0.187   |                              |                              |                              | 0.76** (0.62 - 0.94) p=0.010 |
| Steroids               | 6.02** (5.31 - 6.82) p<0.001 |                              |                              |                              | 4.16** (3.55 - 4.88) p<0.001 |
| Tocilizumab            | 1.85** (1.48 - 2.31) p<0.001 |                              |                              |                              | 0.86 (0.65 - 1.14) p=0.293   |
| Remdesivir             | 1.85** (1.40 - 2.44) p<0.001 |                              |                              |                              | 0.93 (0.68 - 1.28) p=0.663   |
| Convalescent Plasma    | 2.81** (2.27 - 3.50) p<0.001 |                              |                              |                              | 0.89 (0.68 - 1.17) p=0.399   |
| Cafepime               | 4.43** (3.89 - 5.06) p<0.001 |                              |                              |                              | 2.65** (2.24 - 3.12) p<0.001 |



**Table S5. DKA Cohort: Univariate and multivariate logistic regression analysis for the outcome of intubation**

| Variables           | Univariate Analysis           | Multivariate Analysis        | Multivariate Analysis        | Multivariate Analysis        | Multivariate Analysis         |
|---------------------|-------------------------------|------------------------------|------------------------------|------------------------------|-------------------------------|
|                     |                               | Model 1                      | Model 2                      | Model 3                      | Model 4                       |
|                     |                               | n=422                        | n=422                        | n=422                        | n=422                         |
|                     | OR (95% CI), p- value         | OR (95% CI), p- value        | OR (95% CI), p- value        | OR (95% CI), p- value        | OR (95% CI), p- value         |
| Age per 10          | 1.15 (0.97 - 1.38) p=0.112    | 1.14 (0.94 - 1.38) p=0.190   | 1.18 (0.96 - 1.45) p=0.107   | 1.23* (1.01 - 1.50) p=0.042  | 1.14 (0.88 - 1.47) p=0.331    |
| Male                | 0.93 (0.48 - 1.78) p=0.822    | 1.18 (0.60 - 2.29) p=0.634   | 1.09 (0.55 - 2.15) p=0.813   | 1.24 (0.58 - 2.64) p=0.583   | 0.97 (0.39 - 2.42) p=0.940    |
| BMI                 | 1.03 (1.00 - 1.06) p=0.070    | 1.04* (1.01 - 1.07) p=0.021  | 1.04** (1.01 - 1.08) p=0.009 | 1.04* (1.01 - 1.08) p=0.020  | 1.04 (0.99 - 1.08) p=0.086    |
| Covid-19            | 2.72** (1.36 - 5.45) p=0.005  | 2.66** (1.27 - 5.57) p=0.009 | 2.76** (1.33 - 5.72) p=0.006 | 2.42* (1.14 - 5.14) p=0.021  | 1.69 (0.66 - 4.29) p=0.272    |
| Type 1 Diabetes     | 1.05 (0.50 - 2.21) p=0.907    |                              | 1.58 (0.67 - 3.70) p=0.296   | 1.73 (0.70 - 4.26) p=0.233   | 2.96 (0.98 - 8.97) p=0.055    |
| Hypertension        | 0.82 (0.38 - 1.78) p=0.620    |                              | 0.71 (0.33 - 1.54) p=0.385   | 0.92 (0.38 - 2.19) p=0.844   | 1.01 (0.40 - 2.53) p=0.983    |
| Hyperlipidemia      | 0.82 (0.28 - 2.42) p=0.722    |                              | 0.67 (0.19 - 2.40) p=0.539   | 0.87 (0.22 - 3.46) p=0.839   | 1.35 (0.24 - 7.50) p=0.729    |
| Asthma              | 0.71 (0.09 - 5.60) p=0.745    |                              | 0.73 (0.10 - 5.56) p=0.759   | 0.48 (0.12 - 1.90) p=0.297   | 0.16 (0.02 - 1.00) p=0.050    |
| Heart Failure       | 0.56 (0.07 - 4.38) p=0.583    |                              | 0.38 (0.04 - 3.84) p=0.409   | 0.38 (0.03 - 4.49) p=0.445   | 0.78 (0.08 - 7.35) p=0.830    |
| ESRD                | 1.08 (0.24 - 4.86) p=0.923    |                              | 1.30 (0.21 - 8.17) p=0.782   | 1.87 (0.23 - 15.54) p=0.561  | 2.73 (0.25 - 29.62) p=0.410   |
| CKD                 | 1.89 (0.68 - 5.24) p=0.221    |                              | 2.53 (0.76 - 8.38) p=0.129   | 3.38 (0.92 - 12.38) p=0.066  | 3.69 (0.92 - 14.87) p=0.066   |
| Biguanides          | 0.93 (0.35 - 2.47) p=0.877    |                              |                              | 2.03 (0.61 - 6.79) p=0.251   | 3.70 (0.93 - 14.79) p=0.064   |
| DPP4-inhibitors     | 0.26* (0.08 - 0.85) p=0.026   |                              |                              | 0.17** (0.05 - 0.60) p=0.006 | 0.18* (0.04 - 0.74) p=0.017   |
| GLP-1 agonists      | 4.37 (0.39 - 49.36) p=0.233   |                              |                              | 6.40 (0.92 - 44.62) p=0.061  | 2.51 (0.23 - 27.91) p=0.455   |
| Insulin             | 0.57 (0.30 - 1.07) p=0.082    |                              |                              | 0.58 (0.28 - 1.22) p=0.151   | 0.58 (0.23 - 1.43) p=0.236    |
| ACE inhibitors      | 0.34* (0.14 - 0.84) p=0.019   |                              |                              | 0.29* (0.11 - 0.78) p=0.014  | 0.26* (0.08 - 0.81) p=0.020   |
| Sulfonylureas       | 3.55 (0.67 - 18.92) p=0.137   |                              |                              | 6.77 (0.56 - 81.25) p=0.131  | 14.91 (0.79 - 282.36) p=0.072 |
| Statins             | 0.78 (0.42 - 1.46) p=0.443    |                              |                              | 0.99 (0.48 - 2.07) p=0.983   | 1.01 (0.43 - 2.39) p=0.983    |
| Heparin             | 1.89 (0.95 - 3.80) p=0.072    |                              |                              |                              | 1.34 (0.48 - 3.76) p=0.575    |
| E0xaparin           | 0.89 (0.48 - 1.67) p=0.717    |                              |                              |                              | 0.43 (0.16 - 1.13) p=0.085    |
| Apixaban            | 1.16 (0.39 - 3.47) p=0.790    |                              |                              |                              | 0.27 (0.06 - 1.30) p=0.102    |
| Steroids            | 9.67** (4.90 - 19.09) p<0.001 |                              |                              |                              | 9.55** (3.84 - 23.76) p<0.001 |
| Tocilizumab         | 1.45 (0.31 - 6.72) p=0.633    |                              |                              |                              | 0.21 (0.02 - 2.11) p=0.184    |
| Remdesivir          | 2.91 (0.30 - 28.64) p=0.361   |                              |                              |                              | 4.11 (0.18 - 92.78) p=0.374   |
| Convalescent Plasma | 2.69 (0.71 - 10.20) p=0.145   |                              |                              |                              | 0.72 (0.12 - 4.18) p=0.712    |
| Cefepime            | 6.25** (3.17 - 12.33) p<0.001 |                              |                              |                              | 4.26** (1.64 - 11.02) p=0.003 |

**Table S6. Baseline patient characteristics: Univariate and multivariate logistic regression analysis for the outcome of ICU admission**

| Variables              | Univariate Analysis                   | Multivariate Analysis                | Multivariate Analysis                | Multivariate Analysis                | Multivariate Analysis                |
|------------------------|---------------------------------------|--------------------------------------|--------------------------------------|--------------------------------------|--------------------------------------|
|                        |                                       | Model 1                              | Model 2                              | Model 3                              | Model 4                              |
|                        |                                       | n=22,694                             | n=22,694                             | n=22,694                             | n=22,694                             |
|                        | OR (95% CI), <i>p</i> - value         | OR (95% CI), <i>p</i> - value        | OR (95% CI), <i>p</i> - value        | OR (95% CI), <i>p</i> - value        | OR (95% CI), <i>p</i> - value        |
| Age per 10             | 1.08** (1.06 - 1.10) <i>p</i> <0.001  | 1.12** (1.10 - 1.14) <i>p</i> <0.001 | 1.09** (1.07 - 1.12) <i>p</i> <0.001 | 1.11** (1.08 - 1.13) <i>p</i> <0.001 | 1.04** (1.01 - 1.06) <i>p</i> =0.003 |
| Male                   | 1.36** (1.27 - 1.45) <i>p</i> <0.001  | 1.43** (1.33 - 1.53) <i>p</i> <0.001 | 1.42** (1.32 - 1.52) <i>p</i> <0.001 | 1.43** (1.33 - 1.53) <i>p</i> <0.001 | 1.32** (1.22 - 1.42) <i>p</i> <0.001 |
| BMI                    | 1.01** (1.00 - 1.01) <i>p</i> <0.001  | 1.02** (1.01 - 1.02) <i>p</i> <0.001 | 1.02** (1.01 - 1.02) <i>p</i> <0.001 | 1.02** (1.01 - 1.02) <i>p</i> <0.001 | 1.01** (1.01 - 1.01) <i>p</i> <0.001 |
| Covid-19               | 1.78** (1.66 - 1.90) <i>p</i> <0.001  | 1.81** (1.69 - 1.94) <i>p</i> <0.001 | 1.84** (1.71 - 1.97) <i>p</i> <0.001 | 1.83** (1.71 - 1.96) <i>p</i> <0.001 | 1.06 (0.97 - 1.15) <i>p</i> =0.185   |
| Diabetic Ketoacidosis  | 5.99** (4.93 - 7.29) <i>p</i> <0.001  | 6.94** (5.64 - 8.53) <i>p</i> <0.001 | 4.28** (3.42 - 5.35) <i>p</i> <0.001 | 4.24** (3.38 - 5.33) <i>p</i> <0.001 | 5.09** (3.96 - 6.53) <i>p</i> <0.001 |
| History of DM          | 2.18** (2.04 - 2.34) <i>p</i> <0.001  |                                      | 2.01** (1.87 - 2.17) <i>p</i> <0.001 | 2.20** (2.02 - 2.40) <i>p</i> <0.001 | 1.60** (1.45 - 1.75) <i>p</i> <0.001 |
| Type 1 Diabetes        | 4.49** (3.22 - 6.28) <i>p</i> <0.001  |                                      | 1.57* (1.05 - 2.34) <i>p</i> =0.027  | 1.46 (0.98 - 2.19) <i>p</i> =0.066   | 1.64* (1.06 - 2.55) <i>p</i> =0.027  |
| Hypertension           | 1.01 (0.93 - 1.09) <i>p</i> =0.804    |                                      | 0.84** (0.77 - 0.93) <i>p</i> <0.001 | 0.88* (0.80 - 0.97) <i>p</i> =0.012  | 0.90* (0.81 - 1.00) <i>p</i> =0.045  |
| Hyperlipidemia         | 0.90 (0.81 - 1.02) <i>p</i> =0.094    |                                      | 0.77** (0.68 - 0.88) <i>p</i> <0.001 | 0.86* (0.75 - 0.98) <i>p</i> =0.025  | 0.94 (0.81 - 1.08) <i>p</i> =0.387   |
| Pulmonary Hypertension | 0.79 (0.47 - 1.33) <i>p</i> =0.381    |                                      | 0.84 (0.49 - 1.46) <i>p</i> =0.537   | 0.80 (0.46 - 1.41) <i>p</i> =0.444   | 0.78 (0.41 - 1.50) <i>p</i> =0.461   |
| COPD                   | 0.87 (0.69 - 1.11) <i>p</i> =0.271    |                                      | 0.91 (0.71 - 1.17) <i>p</i> =0.471   | 0.93 (0.72 - 1.19) <i>p</i> =0.560   | 0.68** (0.52 - 0.88) <i>p</i> =0.004 |
| Asthma                 | 0.80* (0.67 - 0.95) <i>p</i> =0.013   |                                      | 0.88 (0.73 - 1.06) <i>p</i> =0.165   | 0.88 (0.73 - 1.05) <i>p</i> =0.160   | 0.68** (0.56 - 0.83) <i>p</i> <0.001 |
| CAD                    | 1.02 (0.85 - 1.23) <i>p</i> =0.824    |                                      | 0.92 (0.75 - 1.12) <i>p</i> =0.398   | 0.94 (0.77 - 1.16) <i>p</i> =0.578   | 1.07 (0.86 - 1.34) <i>p</i> =0.535   |
| Heart Failure          | 1.03 (0.89 - 1.19) <i>p</i> =0.676    |                                      | 0.92 (0.78 - 1.08) <i>p</i> =0.305   | 0.94 (0.80 - 1.11) <i>p</i> =0.482   | 1.03 (0.87 - 1.23) <i>p</i> =0.716   |
| Stroke/TIA             | 1.16 (0.88 - 1.53) <i>p</i> =0.298    |                                      | 1.04 (0.78 - 1.39) <i>p</i> =0.777   | 1.08 (0.81 - 1.44) <i>p</i> =0.604   | 1.36* (1.01 - 1.85) <i>p</i> =0.046  |
| ESRD                   | 1.56** (1.36 - 1.80) <i>p</i> <0.001  |                                      | 1.56** (1.34 - 1.83) <i>p</i> <0.001 | 1.47** (1.25 - 1.72) <i>p</i> <0.001 | 1.28** (1.08 - 1.52) <i>p</i> =0.004 |
| Chronic Kidney Disease | 1.17* (1.02 - 1.34) <i>p</i> =0.022   |                                      | 0.94 (0.81 - 1.10) <i>p</i> =0.430   | 0.92 (0.79 - 1.07) <i>p</i> =0.290   | 1.01 (0.85 - 1.19) <i>p</i> =0.945   |
| Biguanides             | 0.74** (0.65 - 0.84) <i>p</i> <0.001  |                                      |                                      | 0.57** (0.50 - 0.65) <i>p</i> <0.001 | 0.67** (0.58 - 0.77) <i>p</i> <0.001 |
| DPP4-inhibitors        | 1.04 (0.92 - 1.18) <i>p</i> =0.510    |                                      |                                      | 0.85* (0.74 - 0.98) <i>p</i> =0.021  | 0.93 (0.80 - 1.08) <i>p</i> =0.339   |
| SGLT-2 inhibitors      | 0.80 (0.36 - 1.80) <i>p</i> =0.596    |                                      |                                      | 1.00 (0.42 - 2.37) <i>p</i> =0.999   | 1.02 (0.42 - 2.46) <i>p</i> =0.968   |
| GLP-1 agonists         | 1.17 (0.81 - 1.69) <i>p</i> =0.388    |                                      |                                      | 1.20 (0.81 - 1.78) <i>p</i> =0.360   | 1.15 (0.77 - 1.74) <i>p</i> =0.490   |
| Insulin                | 1.56** (1.45 - 1.66) <i>p</i> <0.001  |                                      |                                      | 1.15** (1.05 - 1.26) <i>p</i> =0.002 | 1.12* (1.02 - 1.23) <i>p</i> =0.021  |
| ACE inhibitors         | 1.05 (0.97 - 1.14) <i>p</i> =0.245    |                                      |                                      | 0.94 (0.86 - 1.03) <i>p</i> =0.162   | 1.00 (0.91 - 1.10) <i>p</i> =0.994   |
| Sulfonylureas          | 0.73* (0.55 - 0.95) <i>p</i> =0.022   |                                      |                                      | 0.67** (0.51 - 0.90) <i>p</i> =0.007 | 0.73* (0.54 - 1.00) <i>p</i> =0.049  |
| Statins                | 1.07* (1.00 - 1.15) <i>p</i> =0.040   |                                      |                                      | 0.82** (0.75 - 0.89) <i>p</i> <0.001 | 0.74** (0.67 - 0.80) <i>p</i> <0.001 |
| Heparin                | 2.43** (2.27 - 2.60) <i>p</i> <0.001  |                                      |                                      |                                      | 2.40** (2.21 - 2.61) <i>p</i> <0.001 |
| Enoxaparin             | 1.73** (1.62 - 1.85) <i>p</i> <0.001  |                                      |                                      |                                      | 1.70** (1.55 - 1.86) <i>p</i> <0.001 |
| Apixaban               | 1.69** (1.53 - 1.86) <i>p</i> <0.001  |                                      |                                      |                                      | 1.27** (1.13 - 1.43) <i>p</i> <0.001 |
| Steroids               | 5.06** (4.71 - 5.43) <i>p</i> <0.001  |                                      |                                      |                                      | 3.36** (3.09 - 3.65) <i>p</i> <0.001 |
| Tocilizumab            | 4.15** (3.53 - 4.89) <i>p</i> <0.001  |                                      |                                      |                                      | 1.39** (1.14 - 1.70) <i>p</i> =0.001 |
| Remdesivir             | 4.50** (3.69 - 5.48) <i>p</i> <0.001  |                                      |                                      |                                      | 1.41** (1.12 - 1.78) <i>p</i> =0.004 |
| Convalescent Plasma    | 9.08** (7.57 - 10.88) <i>p</i> <0.001 |                                      |                                      |                                      | 2.05** (1.63 - 2.58) <i>p</i> <0.001 |
| Cafepime               | 5.25** (4.80 - 5.75) <i>p</i> <0.001  |                                      |                                      |                                      | 2.88** (2.60 - 3.19) <i>p</i> <0.001 |

**Table S7. COVID-19 Cohort: Univariate and multivariate logistic regression analysis for the outcome of ICU admission**

| Variables              | Univariate Analysis          | Multivariate Analysis        | Multivariate Analysis        | Multivariate Analysis        | Multivariate Analysis        |
|------------------------|------------------------------|------------------------------|------------------------------|------------------------------|------------------------------|
|                        |                              | Model 1                      | Model 2                      | Model 3                      | Model 4                      |
|                        |                              | n=11,371                     | n=11,371                     | n=11,371                     | n=11,371                     |
|                        | OR (95% CI), p- value        |
| Age per 10             | 1.05** (1.03 - 1.07) p<0.001 | 1.09** (1.06 - 1.12) p<0.001 | 1.05** (1.02 - 1.08) p<0.001 | 1.05** (1.02 - 1.08) p=0.001 | 0.99 (0.96 - 1.02) p=0.559   |
| Male                   | 1.41** (1.30 - 1.54) p<0.001 | 1.60** (1.46 - 1.76) p<0.001 | 1.60** (1.45 - 1.76) p<0.001 | 1.60** (1.45 - 1.76) p<0.001 | 1.38** (1.24 - 1.54) p<0.001 |
| BMI                    | 1.02** (1.02 - 1.03) p<0.001 | 1.03** (1.03 - 1.04) p<0.001 | 1.03** (1.02 - 1.03) p<0.001 | 1.03** (1.02 - 1.03) p<0.001 | 1.02** (1.02 - 1.03) p<0.001 |
| Diabetic Ketoacidosis  | 5.81** (4.51 - 7.49) p<0.001 | 5.86** (4.45 - 7.72) p<0.001 | 3.77** (2.79 - 5.11) p<0.001 | 3.79** (2.78 - 5.18) p<0.001 | 5.02** (3.48 - 7.25) p<0.001 |
| History of DM          | 2.60** (2.39 - 2.83) p<0.001 |                              | 2.36** (2.14 - 2.60) p<0.001 | 2.63** (2.36 - 2.94) p<0.001 | 1.71** (1.51 - 1.94) p<0.001 |
| Type 1 Diabetes        | 3.42** (2.12 - 5.51) p<0.001 |                              | 0.86 (0.49 - 1.50) p=0.594   | 0.81 (0.46 - 1.44) p=0.479   | 0.89 (0.46 - 1.71) p=0.719   |
| Hypertension           | 1.06 (0.96 - 1.17) p=0.269   |                              | 0.91 (0.80 - 1.03) p=0.147   | 0.98 (0.86 - 1.12) p=0.767   | 0.95 (0.82 - 1.09) p=0.442   |
| Hyperlipidemia         | 0.88 (0.76 - 1.02) p=0.102   |                              | 0.74** (0.62 - 0.88) p=0.001 | 0.81* (0.68 - 0.97) p=0.021  | 0.91 (0.75 - 1.11) p=0.343   |
| Pulmonary Hypertension | 0.85 (0.41 - 1.76) p=0.664   |                              | 0.84 (0.37 - 1.91) p=0.679   | 0.80 (0.35 - 1.83) p=0.593   | 0.82 (0.28 - 2.40) p=0.713   |
| COPD                   | 0.88 (0.64 - 1.20) p=0.421   |                              | 1.04 (0.74 - 1.48) p=0.811   | 1.06 (0.75 - 1.49) p=0.758   | 0.85 (0.59 - 1.23) p=0.397   |
| Asthma                 | 0.76* (0.61 - 0.96) p=0.019  |                              | 0.83 (0.65 - 1.06) p=0.135   | 0.83 (0.65 - 1.07) p=0.145   | 0.67** (0.51 - 0.88) p=0.004 |
| CAD                    | 1.02 (0.81 - 1.30) p=0.844   |                              | 0.99 (0.76 - 1.30) p=0.964   | 1.01 (0.77 - 1.33) p=0.931   | 1.24 (0.92 - 1.69) p=0.158   |
| Heart Failure          | 0.90 (0.74 - 1.09) p=0.286   |                              | 0.76* (0.61 - 0.96) p=0.023  | 0.77* (0.61 - 0.97) p=0.028  | 0.96 (0.75 - 1.24) p=0.777   |
| Stroke/TIA             | 1.10 (0.77 - 1.57) p=0.592   |                              | 0.98 (0.67 - 1.43) p=0.919   | 1.00 (0.69 - 1.47) p=0.983   | 1.32 (0.88 - 1.98) p=0.177   |
| ESRD                   | 1.65** (1.38 - 1.98) p<0.001 |                              | 1.77** (1.43 - 2.18) p<0.001 | 1.65** (1.33 - 2.04) p<0.001 | 1.21 (0.96 - 1.53) p=0.107   |
| Chronic Kidney Disease | 1.15 (0.96 - 1.37) p=0.131   |                              | 0.85 (0.69 - 1.06) p=0.146   | 0.82 (0.66 - 1.02) p=0.073   | 0.90 (0.71 - 1.14) p=0.369   |
| Biguanides             | 0.70** (0.60 - 0.82) p<0.001 |                              |                              | 0.50** (0.42 - 0.60) p<0.001 | 0.62** (0.51 - 0.76) p<0.001 |
| DPP4-inhibitors        | 0.97 (0.83 - 1.14) p=0.728   |                              |                              | 0.81* (0.68 - 0.98) p=0.027  | 0.93 (0.76 - 1.15) p=0.519   |
| SGLT-2 inhibitors      | 1.57 (0.65 - 3.83) p=0.317   |                              |                              | 1.99 (0.68 - 5.79) p=0.207   | 1.98 (0.55 - 7.12) p=0.296   |
| GLP-1 agonists         | 1.13 (0.70 - 1.83) p=0.617   |                              |                              | 1.17 (0.68 - 2.01) p=0.577   | 1.16 (0.65 - 2.07) p=0.623   |
| Insulin                | 1.57** (1.45 - 1.71) p<0.001 |                              |                              | 1.09 (0.97 - 1.22) p=0.154   | 1.12 (0.99 - 1.27) p=0.082   |
| ACE inhibitors         | 1.01 (0.91 - 1.12) p=0.855   |                              |                              | 0.92 (0.81 - 1.04) p=0.178   | 1.04 (0.91 - 1.19) p=0.568   |
| Sulfonylureas          | 0.69* (0.50 - 0.97) p=0.030  |                              |                              | 0.64* (0.44 - 0.94) p=0.022  | 0.63* (0.41 - 0.97) p=0.036  |
| Statins                | 1.11** (1.03 - 1.21) p=0.010 |                              |                              | 0.94 (0.84 - 1.04) p=0.232   | 0.79** (0.70 - 0.89) p<0.001 |
| Heparin                | 2.89** (2.66 - 3.15) p<0.001 |                              |                              |                              | 2.51** (2.24 - 2.81) p<0.001 |
| Enoxaparin             | 1.57** (1.44 - 1.72) p<0.001 |                              |                              |                              | 1.54** (1.36 - 1.74) p<0.001 |
| Apixaban               | 1.74** (1.55 - 1.95) p<0.001 |                              |                              |                              | 1.15 (0.99 - 1.33) p=0.059   |
| Steroids               | 6.84** (6.25 - 7.48) p<0.001 |                              |                              |                              | 3.97** (3.56 - 4.43) p<0.001 |
| Tocilizumab            | 3.26** (2.78 - 3.82) p<0.001 |                              |                              |                              | 1.32** (1.07 - 1.61) p=0.008 |
| Remdesivir             | 3.81** (3.12 - 4.65) p<0.001 |                              |                              |                              | 1.33* (1.05 - 1.69) p=0.018  |
| Convalescent Plasma    | 8.01** (6.67 - 9.61) p<0.001 |                              |                              |                              | 2.00** (1.59 - 2.53) p<0.001 |
| Cafepime               | 4.99** (4.49 - 5.55) p<0.001 |                              |                              |                              | 2.74** (2.41 - 3.11) p<0.001 |

**Table S8. DKA Cohort: Univariate and multivariate logistic regression analysis for the outcome of ICU admission**

| Variables              | Univariate Analysis                  | Multivariate Analysis                          | Multivariate Analysis                          | Multivariate Analysis                          | Multivariate Analysis                          |
|------------------------|--------------------------------------|------------------------------------------------|------------------------------------------------|------------------------------------------------|------------------------------------------------|
|                        |                                      | Model 1                                        | Model 2                                        | Model 3                                        | Model 4                                        |
|                        | OR (95% CI), <i>p</i> - value        | <i>n</i> =422<br>OR (95% CI), <i>p</i> - value | <i>n</i> =422<br>OR (95% CI), <i>p</i> - value | <i>n</i> =422<br>OR (95% CI), <i>p</i> - value | <i>n</i> =422<br>OR (95% CI), <i>p</i> - value |
| Age per 10             | 1.03 (0.93 - 1.16) <i>p</i> =0.552   | 1.03 (0.91 - 1.15) <i>p</i> =0.671             | 1.10 (0.97 - 1.26) <i>p</i> =0.147             | 1.06 (0.92 - 1.21) <i>p</i> =0.435             | 1.00 (0.87 - 1.17) <i>p</i> =0.952             |
| Male                   | 0.72 (0.48 - 1.08) <i>p</i> =0.113   | 0.77 (0.50 - 1.18) <i>p</i> =0.236             | 0.75 (0.48 - 1.16) <i>p</i> =0.199             | 0.71 (0.45 - 1.12) <i>p</i> =0.137             | 0.65 (0.40 - 1.04) <i>p</i> =0.070             |
| BMI                    | 1.02 (0.99 - 1.05) <i>p</i> =0.140   | 1.02 (0.99 - 1.04) <i>p</i> =0.192             | 1.03* (1.00 - 1.06) <i>p</i> =0.047            | 1.02 (0.99 - 1.05) <i>p</i> =0.165             | 1.01 (0.98 - 1.05) <i>p</i> =0.376             |
| Covid-19               | 1.28 (0.87 - 1.89) <i>p</i> =0.207   | 1.27 (0.86 - 1.88) <i>p</i> =0.231             | 1.21 (0.81 - 1.81) <i>p</i> =0.356             | 1.18 (0.77 - 1.80) <i>p</i> =0.448             | 1.19 (0.72 - 1.97) <i>p</i> =0.496             |
| Type 1 Diabetes        | 1.38 (0.86 - 2.23) <i>p</i> =0.180   |                                                | 1.75* (1.02 - 3.01) <i>p</i> =0.041            | 2.03* (1.16 - 3.55) <i>p</i> =0.013            | 2.42** (1.35 - 4.37) <i>p</i> =0.003           |
| Hypertension           | 0.77 (0.49 - 1.22) <i>p</i> =0.269   |                                                | 0.71 (0.41 - 1.23) <i>p</i> =0.216             | 0.84 (0.47 - 1.51) <i>p</i> =0.566             | 0.79 (0.42 - 1.49) <i>p</i> =0.463             |
| Hyperlipidemia         | 1.13 (0.60 - 2.12) <i>p</i> =0.704   |                                                | 1.30 (0.64 - 2.64) <i>p</i> =0.474             | 1.34 (0.64 - 2.82) <i>p</i> =0.436             | 1.73 (0.74 - 4.06) <i>p</i> =0.208             |
| Asthma                 | 0.63 (0.21 - 1.91) <i>p</i> =0.412   |                                                | 0.63 (0.20 - 2.01) <i>p</i> =0.436             | 0.73 (0.20 - 2.64) <i>p</i> =0.632             | 0.56 (0.12 - 2.59) <i>p</i> =0.455             |
| CAD                    | 1.12 (0.18 - 6.77) <i>p</i> =0.904   |                                                | 1.28 (0.25 - 6.46) <i>p</i> =0.768             | 1.04 (0.24 - 4.49) <i>p</i> =0.962             | 1.07 (0.24 - 4.69) <i>p</i> =0.933             |
| Heart Failure          | 0.32* (0.11 - 0.95) <i>p</i> =0.040  |                                                | 0.29* (0.09 - 0.91) <i>p</i> =0.034            | 0.34 (0.11 - 1.08) <i>p</i> =0.067             | 0.37 (0.10 - 1.40) <i>p</i> =0.145             |
| Stroke/TIA             | 1.49 (0.13 - 16.63) <i>p</i> =0.745  |                                                | 1.64 (0.20 - 13.22) <i>p</i> =0.642            | 1.34 (0.16 - 11.10) <i>p</i> =0.786            | 1.85 (0.21 - 16.14) <i>p</i> =0.579            |
| ESRD                   | 0.73 (0.28 - 1.89) <i>p</i> =0.521   |                                                | 1.03 (0.38 - 2.85) <i>p</i> =0.948             | 0.94 (0.31 - 2.83) <i>p</i> =0.909             | 0.75 (0.22 - 2.53) <i>p</i> =0.643             |
| Chronic Kidney Disease | 0.68 (0.32 - 1.44) <i>p</i> =0.309   |                                                | 0.89 (0.37 - 2.13) <i>p</i> =0.798             | 0.85 (0.33 - 2.14) <i>p</i> =0.725             | 0.74 (0.30 - 1.84) <i>p</i> =0.516             |
| beguanides             | 0.68 (0.38 - 1.23) <i>p</i> =0.202   |                                                |                                                | 0.68 (0.36 - 1.31) <i>p</i> =0.249             | 0.80 (0.41 - 1.57) <i>p</i> =0.515             |
| DPP4-inhibitors        | 1.20 (0.74 - 1.95) <i>p</i> =0.450   |                                                |                                                | 1.21 (0.69 - 2.13) <i>p</i> =0.502             | 1.33 (0.71 - 2.49) <i>p</i> =0.374             |
| glp1                   | 1.49 (0.13 - 16.63) <i>p</i> =0.745  |                                                |                                                | 1.53 (0.04 - 62.48) <i>p</i> =0.823            | 1.45 (0.01 - 232.09) <i>p</i> =0.885           |
| insulin                | 0.44** (0.28 - 0.68) <i>p</i> <0.001 |                                                |                                                | 0.44** (0.27 - 0.71) <i>p</i> =0.001           | 0.43** (0.26 - 0.72) <i>p</i> =0.001           |
| ACE inhibitors         | 0.81 (0.53 - 1.23) <i>p</i> =0.314   |                                                |                                                | 0.82 (0.51 - 1.32) <i>p</i> =0.409             | 0.71 (0.42 - 1.21) <i>p</i> =0.208             |
| Sulfonylureas          | 4.55 (0.54 - 38.23) <i>p</i> =0.163  |                                                |                                                | 4.74 (0.54 - 41.43) <i>p</i> =0.159            | 5.36 (0.43 - 66.75) <i>p</i> =0.192            |
| Statins                | 1.25 (0.85 - 1.84) <i>p</i> =0.262   |                                                |                                                | 1.61 (0.99 - 2.60) <i>p</i> =0.053             | 1.72* (1.03 - 2.87) <i>p</i> =0.038            |
| Heparin                | 2.43** (1.63 - 3.63) <i>p</i> <0.001 |                                                |                                                |                                                | 1.73* (1.00 - 2.98) <i>p</i> =0.050            |
| E0xaparin              | 0.61* (0.41 - 0.91) <i>p</i> =0.016  |                                                |                                                |                                                | 0.53* (0.29 - 0.96) <i>p</i> =0.038            |
| Apixaban               | 1.22 (0.59 - 2.51) <i>p</i> =0.588   |                                                |                                                |                                                | 0.97 (0.36 - 2.62) <i>p</i> =0.947             |
| Steroids               | 3.66** (2.11 - 6.34) <i>p</i> <0.001 |                                                |                                                |                                                | 3.15** (1.60 - 6.22) <i>p</i> =0.001           |
| Tocilizumab            | 4.64* (1.02 - 21.05) <i>p</i> =0.046 |                                                |                                                |                                                | 1.43 (0.17 - 12.09) <i>p</i> =0.740            |
| Remdesivir             | 0.74 (0.10 - 5.33) <i>p</i> =0.766   |                                                |                                                |                                                | 0.20 (0.03 - 1.21) <i>p</i> =0.080             |
| Convalescent Plasma    | 2.54 (0.69 - 9.39) <i>p</i> =0.161   |                                                |                                                |                                                | 1.09 (0.20 - 6.00) <i>p</i> =0.917             |
| Cefepime               | 2.28** (1.24 - 4.19) <i>p</i> =0.008 |                                                |                                                |                                                | 1.64 (0.80 - 3.36) <i>p</i> =0.175             |

**Table S9. Baseline patient characteristics: Univariate and multivariate logistic regression analysis for the outcome of Renal Replacement Therapy**

| Variables              | Univariate Analysis                     | Multivariate Analysis                | Multivariate Analysis                   | Multivariate Analysis                   | Multivariate Analysis                   |
|------------------------|-----------------------------------------|--------------------------------------|-----------------------------------------|-----------------------------------------|-----------------------------------------|
|                        |                                         | Model 1                              | Model 2                                 | Model 3                                 | Model 4                                 |
|                        |                                         | n=22,694                             | n=22,694                                | n=22,694                                | n=22,694                                |
|                        | OR (95% CI), <i>p</i> - value           | OR (95% CI), <i>p</i> - value        | OR (95% CI), <i>p</i> - value           | OR (95% CI), <i>p</i> - value           | OR (95% CI), <i>p</i> - value           |
| Age per 10             | 1.10** (1.07 - 1.12) <i>p</i> <0.001    | 1.13** (1.10 - 1.16) <i>p</i> <0.001 | 1.09** (1.05 - 1.13) <i>p</i> <0.001    | 1.03 (0.99 - 1.07) <i>p</i> =0.177      | 0.95** (0.91 - 0.99) <i>p</i> =0.010    |
| Male                   | 1.44** (1.29 - 1.61) <i>p</i> <0.001    | 1.51** (1.35 - 1.69) <i>p</i> <0.001 | 1.58** (1.39 - 1.80) <i>p</i> <0.001    | 1.58** (1.39 - 1.81) <i>p</i> <0.001    | 1.47** (1.28 - 1.70) <i>p</i> <0.001    |
| BMI                    | 1.00 (1.00 - 1.01) <i>p</i> =0.147      | 1.02** (1.01 - 1.02) <i>p</i> <0.001 | 1.02** (1.01 - 1.03) <i>p</i> <0.001    | 1.02** (1.01 - 1.03) <i>p</i> <0.001    | 1.02** (1.01 - 1.03) <i>p</i> <0.001    |
| Covid-19               | 2.12** (1.89 - 2.37) <i>p</i> <0.001    | 2.13** (1.90 - 2.39) <i>p</i> <0.001 | 2.77** (2.42 - 3.16) <i>p</i> <0.001    | 2.89** (2.52 - 3.31) <i>p</i> <0.001    | 2.43** (2.09 - 2.83) <i>p</i> <0.001    |
| Diabetic Ketoacidosis  | 1.47* (1.05 - 2.06) <i>p</i> =0.026     | 1.59** (1.13 - 2.23) <i>p</i> =0.008 | 1.21 (0.77 - 1.91) <i>p</i> =0.406      | 1.13 (0.71 - 1.79) <i>p</i> =0.612      | 0.96 (0.61 - 1.50) <i>p</i> =0.854      |
| History of DM          | 2.75** (2.46 - 3.08) <i>p</i> <0.001    |                                      | 2.38** (2.08 - 2.72) <i>p</i> <0.001    | 2.05** (1.75 - 2.42) <i>p</i> <0.001    | 1.61** (1.37 - 1.91) <i>p</i> <0.001    |
| Type 1 Diabetes        | 1.27 (0.68 - 2.35) <i>p</i> =0.455      |                                      | 0.91 (0.38 - 2.20) <i>p</i> =0.835      | 0.79 (0.33 - 1.89) <i>p</i> =0.595      | 0.89 (0.37 - 2.16) <i>p</i> =0.794      |
| Hypertension           | 2.05** (1.83 - 2.29) <i>p</i> <0.001    |                                      | 0.90 (0.77 - 1.05) <i>p</i> =0.182      | 0.93 (0.79 - 1.09) <i>p</i> =0.346      | 0.99 (0.83 - 1.18) <i>p</i> =0.904      |
| Hyperlipidemia         | 1.26** (1.06 - 1.49) <i>p</i> =0.008    |                                      | 0.66** (0.53 - 0.82) <i>p</i> <0.001    | 0.66** (0.52 - 0.82) <i>p</i> <0.001    | 0.73* (0.58 - 0.93) <i>p</i> =0.012     |
| Pulmonary Hypertension | 2.77** (1.64 - 4.66) <i>p</i> <0.001    |                                      | 1.39 (0.73 - 2.67) <i>p</i> =0.316      | 1.27 (0.65 - 2.47) <i>p</i> =0.487      | 1.35 (0.61 - 2.97) <i>p</i> =0.457      |
| COPD                   | 1.33 (0.95 - 1.85) <i>p</i> =0.095      |                                      | 0.87 (0.59 - 1.29) <i>p</i> =0.493      | 0.89 (0.60 - 1.31) <i>p</i> =0.547      | 0.79 (0.54 - 1.17) <i>p</i> =0.247      |
| Asthma                 | 0.67* (0.49 - 0.91) <i>p</i> =0.011     |                                      | 0.52** (0.36 - 0.76) <i>p</i> =0.001    | 0.58** (0.40 - 0.83) <i>p</i> =0.003    | 0.51** (0.34 - 0.76) <i>p</i> =0.001    |
| CAD                    | 1.93** (1.52 - 2.45) <i>p</i> <0.001    |                                      | 0.91 (0.67 - 1.22) <i>p</i> =0.516      | 0.79 (0.59 - 1.07) <i>p</i> =0.127      | 0.76 (0.55 - 1.03) <i>p</i> =0.079      |
| Heart Failure          | 2.63** (2.22 - 3.12) <i>p</i> <0.001    |                                      | 1.10 (0.87 - 1.40) <i>p</i> =0.430      | 1.05 (0.82 - 1.34) <i>p</i> =0.693      | 1.09 (0.85 - 1.40) <i>p</i> =0.501      |
| Stroke/TIA             | 1.09 (0.70 - 1.71) <i>p</i> =0.698      |                                      | 0.59* (0.38 - 0.91) <i>p</i> =0.018     | 0.54** (0.36 - 0.83) <i>p</i> =0.005    | 0.61 (0.37 - 1.01) <i>p</i> =0.053      |
| ESRD                   | 30.38** (26.40 - 34.96) <i>p</i> <0.001 |                                      | 34.22** (28.62 - 40.91) <i>p</i> <0.001 | 29.27** (24.40 - 35.12) <i>p</i> <0.001 | 27.83** (22.77 - 34.03) <i>p</i> <0.001 |
| Chronic Kidney Disease | 3.92** (3.38 - 4.55) <i>p</i> <0.001    |                                      | 1.12 (0.88 - 1.43) <i>p</i> =0.346      | 1.03 (0.81 - 1.32) <i>p</i> =0.786      | 1.01 (0.79 - 1.30) <i>p</i> =0.930      |
| Biguanides             | 0.26** (0.19 - 0.36) <i>p</i> <0.001    |                                      |                                         | 0.20** (0.14 - 0.28) <i>p</i> <0.001    | 0.22** (0.15 - 0.31) <i>p</i> <0.001    |
| DPP4-inhibitors        | 1.45** (1.22 - 1.73) <i>p</i> <0.001    |                                      |                                         | 1.00 (0.79 - 1.27) <i>p</i> =0.989      | 1.04 (0.81 - 1.33) <i>p</i> =0.758      |
| SGLT-2 inhibitors      | 0.34 (0.05 - 2.48) <i>p</i> =0.288      |                                      |                                         | 0.90 (0.11 - 7.38) <i>p</i> =0.919      | 0.89 (0.11 - 7.35) <i>p</i> =0.916      |
| GLP-1 agonists         | 0.72 (0.35 - 1.47) <i>p</i> =0.366      |                                      |                                         | 0.61 (0.23 - 1.62) <i>p</i> =0.324      | 0.57 (0.22 - 1.48) <i>p</i> =0.250      |
| Insulin                | 2.79** (2.51 - 3.12) <i>p</i> <0.001    |                                      |                                         | 1.68** (1.43 - 1.97) <i>p</i> <0.001    | 1.64** (1.39 - 1.93) <i>p</i> <0.001    |
| ACE inhibitors         | 1.22** (1.08 - 1.39) <i>p</i> =0.001    |                                      |                                         | 0.72** (0.61 - 0.84) <i>p</i> <0.001    | 0.72** (0.61 - 0.85) <i>p</i> <0.001    |
| Sulfonylureas          | 0.55* (0.32 - 0.92) <i>p</i> =0.022     |                                      |                                         | 0.44** (0.24 - 0.82) <i>p</i> =0.009    | 0.55* (0.31 - 0.99) <i>p</i> =0.048     |
| Statins                | 2.39** (2.13 - 2.67) <i>p</i> <0.001    |                                      |                                         | 1.76** (1.52 - 2.05) <i>p</i> <0.001    | 1.66** (1.42 - 1.94) <i>p</i> <0.001    |
| Heparin                | 7.56** (6.53 - 8.75) <i>p</i> <0.001    |                                      |                                         |                                         | 5.26** (4.43 - 6.25) <i>p</i> <0.001    |
| Enoxaparin             | 0.62** (0.56 - 0.69) <i>p</i> <0.001    |                                      |                                         |                                         | 0.68** (0.58 - 0.80) <i>p</i> <0.001    |
| Apixaban               | 2.18** (1.90 - 2.50) <i>p</i> <0.001    |                                      |                                         |                                         | 1.60** (1.33 - 1.92) <i>p</i> <0.001    |
| Steroids               | 2.62** (2.34 - 2.92) <i>p</i> <0.001    |                                      |                                         |                                         | 1.89** (1.63 - 2.21) <i>p</i> <0.001    |
| Tocilizumab            | 1.70** (1.30 - 2.23) <i>p</i> <0.001    |                                      |                                         |                                         | 0.61** (0.43 - 0.86) <i>p</i> =0.005    |
| Remdesivir             | 1.18 (0.81 - 1.72) <i>p</i> =0.380      |                                      |                                         |                                         | 0.49** (0.32 - 0.77) <i>p</i> =0.002    |
| Convalescent Plasma    | 4.22** (3.41 - 5.22) <i>p</i> <0.001    |                                      |                                         |                                         | 1.97** (1.46 - 2.64) <i>p</i> <0.001    |
| Cafepime               | 4.54** (4.02 - 5.12) <i>p</i> <0.001    |                                      |                                         |                                         | 2.76** (2.35 - 3.24) <i>p</i> <0.001    |

**Table S10. COVID-19 Cohort: Univariate and multivariate logistic regression analysis for the outcome of Renal Replacement Therapy**

| Variables              | Univariate Analysis                     | Multivariate Analysis                             | Multivariate Analysis                             | Multivariate Analysis                             | Multivariate Analysis                             |
|------------------------|-----------------------------------------|---------------------------------------------------|---------------------------------------------------|---------------------------------------------------|---------------------------------------------------|
|                        |                                         | Model 1                                           | Model 2                                           | Model 3                                           | Model 4                                           |
|                        | OR (95% CI), <i>p</i> - value           | <i>n</i> =11,371<br>OR (95% CI), <i>p</i> - value | <i>n</i> =11,371<br>OR (95% CI), <i>p</i> - value | <i>n</i> =11,371<br>OR (95% CI), <i>p</i> - value | <i>n</i> =11,371<br>OR (95% CI), <i>p</i> - value |
| Age per 10             | 1.08** (1.05 - 1.11) <i>p</i> <0.001    | 1.12** (1.08 - 1.15) <i>p</i> <0.001              | 1.07** (1.02 - 1.11) <i>p</i> =0.002              | 1.01 (0.97 - 1.06) <i>p</i> =0.574                | 0.93** (0.88 - 0.98) <i>p</i> =0.004              |
| Male                   | 1.51** (1.31 - 1.73) <i>p</i> <0.001    | 1.64** (1.42 - 1.89) <i>p</i> <0.001              | 1.79** (1.53 - 2.11) <i>p</i> <0.001              | 1.81** (1.53 - 2.13) <i>p</i> <0.001              | 1.64** (1.37 - 1.96) <i>p</i> <0.001              |
| BMI                    | 1.01* (1.00 - 1.02) <i>p</i> =0.016     | 1.02** (1.01 - 1.03) <i>p</i> <0.001              | 1.03** (1.02 - 1.04) <i>p</i> <0.001              | 1.03** (1.02 - 1.04) <i>p</i> <0.001              | 1.03** (1.02 - 1.04) <i>p</i> <0.001              |
| Diabetic Ketoacidosis  | 1.56* (1.05 - 2.31) <i>p</i> =0.027     | 1.67* (1.12 - 2.47) <i>p</i> =0.011               | 1.31 (0.76 - 2.26) <i>p</i> =0.337                | 1.21 (0.69 - 2.12) <i>p</i> =0.505                | 1.08 (0.64 - 1.84) <i>p</i> =0.770                |
| History of DM          | 2.75** (2.40 - 3.14) <i>p</i> <0.001    |                                                   | 2.36** (2.00 - 2.77) <i>p</i> <0.001              | 2.14** (1.76 - 2.59) <i>p</i> <0.001              | 1.54** (1.26 - 1.88) <i>p</i> <0.001              |
| Type 1 Diabetes        | 1.17 (0.51 - 2.72) <i>p</i> =0.708      |                                                   | 0.80 (0.25 - 2.54) <i>p</i> =0.711                | 0.74 (0.23 - 2.31) <i>p</i> =0.600                | 0.84 (0.23 - 3.05) <i>p</i> =0.788                |
| Hypertension           | 2.02** (1.76 - 2.32) <i>p</i> <0.001    |                                                   | 0.92 (0.75 - 1.12) <i>p</i> =0.403                | 0.94 (0.77 - 1.16) <i>p</i> =0.576                | 0.96 (0.77 - 1.20) <i>p</i> =0.708                |
| Hyperlipidemia         | 1.18 (0.95 - 1.45) <i>p</i> =0.129      |                                                   | 0.61** (0.46 - 0.81) <i>p</i> =0.001              | 0.58** (0.43 - 0.78) <i>p</i> <0.001              | 0.66* (0.48 - 0.91) <i>p</i> =0.011               |
| Pulmonary Hypertension | 3.30** (1.64 - 6.65) <i>p</i> =0.001    |                                                   | 1.60 (0.70 - 3.67) <i>p</i> =0.267                | 1.65 (0.68 - 3.96) <i>p</i> =0.266                | 2.42 (0.76 - 7.67) <i>p</i> =0.133                |
| COPD                   | 1.75** (1.19 - 2.56) <i>p</i> =0.004    |                                                   | 1.09 (0.70 - 1.69) <i>p</i> =0.705                | 1.06 (0.67 - 1.67) <i>p</i> =0.803                | 1.06 (0.65 - 1.71) <i>p</i> =0.822                |
| Asthma                 | 0.80 (0.56 - 1.14) <i>p</i> =0.224      |                                                   | 0.59* (0.38 - 0.92) <i>p</i> =0.021               | 0.64 (0.40 - 1.00) <i>p</i> =0.052                | 0.56* (0.33 - 0.95) <i>p</i> =0.030               |
| CAD                    | 1.92** (1.42 - 2.58) <i>p</i> <0.001    |                                                   | 0.94 (0.63 - 1.40) <i>p</i> =0.765                | 0.82 (0.55 - 1.23) <i>p</i> =0.339                | 0.84 (0.57 - 1.25) <i>p</i> =0.401                |
| Heart Failure          | 2.94** (2.38 - 3.62) <i>p</i> <0.001    |                                                   | 1.18 (0.87 - 1.60) <i>p</i> =0.284                | 1.10 (0.81 - 1.50) <i>p</i> =0.548                | 1.28 (0.93 - 1.76) <i>p</i> =0.134                |
| Stroke/TIA             | 0.97 (0.55 - 1.72) <i>p</i> =0.923      |                                                   | 0.55* (0.33 - 0.94) <i>p</i> =0.028               | 0.49** (0.29 - 0.83) <i>p</i> =0.008              | 0.51* (0.28 - 0.92) <i>p</i> =0.026               |
| ESRD                   | 28.02** (23.26 - 33.74) <i>p</i> <0.001 |                                                   | 29.75** (23.46 - 37.73) <i>p</i> <0.001           | 27.50** (21.58 - 35.04) <i>p</i> <0.001           | 22.71** (17.21 - 29.96) <i>p</i> <0.001           |
| Chronic Kidney Disease | 3.92** (3.25 - 4.74) <i>p</i> <0.001    |                                                   | 1.33 (0.97 - 1.82) <i>p</i> =0.078                | 1.20 (0.87 - 1.66) <i>p</i> =0.264                | 1.21 (0.88 - 1.67) <i>p</i> =0.232                |
| Biguanides             | 0.36** (0.26 - 0.51) <i>p</i> <0.001    |                                                   |                                                   | 0.26** (0.18 - 0.37) <i>p</i> <0.001              | 0.31** (0.20 - 0.47) <i>p</i> <0.001              |
| DPP4-inhibitors        | 1.59** (1.29 - 1.96) <i>p</i> <0.001    |                                                   |                                                   | 1.24 (0.93 - 1.66) <i>p</i> =0.136                | 1.32 (0.95 - 1.81) <i>p</i> =0.094                |
| SGLT-2 inhibitors      | 0.55 (0.07 - 4.09) <i>p</i> =0.560      |                                                   |                                                   | 1.20 (0.13 - 10.79) <i>p</i> =0.871               | 1.30 (0.13 - 13.28) <i>p</i> =0.825               |
| GLP-1 agonists         | 1.00 (0.46 - 2.16) <i>p</i> =0.997      |                                                   |                                                   | 0.58 (0.17 - 1.98) <i>p</i> =0.382                | 0.58 (0.18 - 1.85) <i>p</i> =0.357                |
| Insulin                | 2.37** (2.08 - 2.70) <i>p</i> <0.001    |                                                   |                                                   | 1.44** (1.19 - 1.75) <i>p</i> <0.001              | 1.44** (1.18 - 1.75) <i>p</i> <0.001              |
| ACE inhibitors         | 1.36** (1.17 - 1.58) <i>p</i> <0.001    |                                                   |                                                   | 0.77** (0.63 - 0.94) <i>p</i> =0.008              | 0.79* (0.64 - 0.97) <i>p</i> =0.028               |
| Sulfonylureas          | 0.67 (0.39 - 1.16) <i>p</i> =0.154      |                                                   |                                                   | 0.53 (0.26 - 1.07) <i>p</i> =0.078                | 0.64 (0.32 - 1.29) <i>p</i> =0.213                |
| Statins                | 2.19** (1.92 - 2.50) <i>p</i> <0.001    |                                                   |                                                   | 1.73** (1.45 - 2.07) <i>p</i> <0.001              | 1.60** (1.33 - 1.94) <i>p</i> <0.001              |
| Heparin                | 10.53** (8.74 - 12.68) <i>p</i> <0.001  |                                                   |                                                   |                                                   | 6.97** (5.57 - 8.72) <i>p</i> <0.001              |
| Enoxaparin             | 0.50** (0.44 - 0.57) <i>p</i> <0.001    |                                                   |                                                   |                                                   | 0.65** (0.54 - 0.78) <i>p</i> <0.001              |
| Apixaban               | 2.24** (1.92 - 2.62) <i>p</i> <0.001    |                                                   |                                                   |                                                   | 1.54** (1.24 - 1.91) <i>p</i> <0.001              |
| Steroids               | 3.25** (2.86 - 3.71) <i>p</i> <0.001    |                                                   |                                                   |                                                   | 2.21** (1.84 - 2.67) <i>p</i> <0.001              |
| Tocilizumab            | 1.45** (1.12 - 1.87) <i>p</i> =0.005    |                                                   |                                                   |                                                   | 0.60** (0.43 - 0.84) <i>p</i> =0.003              |
| Remdesivir             | 0.96 (0.66 - 1.41) <i>p</i> =0.847      |                                                   |                                                   |                                                   | 0.50** (0.32 - 0.77) <i>p</i> =0.002              |
| Convalescent Plasma    | 3.61** (2.91 - 4.47) <i>p</i> <0.001    |                                                   |                                                   |                                                   | 1.86** (1.38 - 2.49) <i>p</i> <0.001              |
| Cafepime               | 4.70** (4.09 - 5.40) <i>p</i> <0.001    |                                                   |                                                   |                                                   | 2.84** (2.36 - 3.42) <i>p</i> <0.001              |

**Table S11. DKA Cohort: Univariate and multivariate logistic regression analysis for the outcome of Renal Replacement Therapy**

| Variables              | Univariate Analysis                    | Multivariate Analysis                          | Multivariate Analysis                          | Multivariate Analysis                          | Multivariate Analysis                          |
|------------------------|----------------------------------------|------------------------------------------------|------------------------------------------------|------------------------------------------------|------------------------------------------------|
|                        |                                        | Model 1                                        | Model 2                                        | Model 3                                        | Model 4                                        |
|                        | OR (95% CI), <i>p</i> - value          | <i>n</i> =422<br>OR (95% CI), <i>p</i> - value | <i>n</i> =422<br>OR (95% CI), <i>p</i> - value | <i>n</i> =422<br>OR (95% CI), <i>p</i> - value | <i>n</i> =422<br>OR (95% CI), <i>p</i> - value |
| Age per 10             | 1.10 (0.92 - 1.33) <i>p</i> =0.291     | 1.10 (0.90 - 1.33) <i>p</i> =0.354             | 1.04 (0.83 - 1.31) <i>p</i> =0.735             | 1.01 (0.78 - 1.32) <i>p</i> =0.924             | 0.91 (0.66 - 1.24) <i>p</i> =0.545             |
| Male                   | 1.03 (0.51 - 2.08) <i>p</i> =0.933     | 1.41 (0.65 - 3.06) <i>p</i> =0.383             | 1.64 (0.70 - 3.85) <i>p</i> =0.252             | 1.62 (0.64 - 4.13) <i>p</i> =0.309             | 2.98 (0.58 - 15.23) <i>p</i> =0.190            |
| BMI                    | 1.04* (1.00 - 1.07) <i>p</i> =0.029    | 1.05** (1.01 - 1.08) <i>p</i> =0.006           | 1.06* (1.01 - 1.11) <i>p</i> =0.010            | 1.06** (1.02 - 1.11) <i>p</i> =0.008           | 1.07* (1.00 - 1.14) <i>p</i> =0.036            |
| Covid-19               | 2.83** (1.34 - 5.99) <i>p</i> =0.007   | 2.92** (1.33 - 6.41) <i>p</i> =0.008           | 3.85** (1.59 - 9.30) <i>p</i> =0.003           | 3.86** (1.61 - 9.26) <i>p</i> =0.003           | 1.22 (0.46 - 3.26) <i>p</i> =0.689             |
| Type 1 Diabetes        | 0.28* (0.08 - 0.93) <i>p</i> =0.038    |                                                | 0.31 (0.06 - 1.74) <i>p</i> =0.184             | 0.33 (0.06 - 1.86) <i>p</i> =0.206             | 0.51 (0.09 - 2.84) <i>p</i> =0.444             |
| Hypertension           | 1.58 (0.76 - 3.25) <i>p</i> =0.219     |                                                | 1.04 (0.33 - 3.26) <i>p</i> =0.941             | 1.03 (0.35 - 3.04) <i>p</i> =0.961             | 0.86 (0.24 - 3.10) <i>p</i> =0.812             |
| Hyperlipidemia         | 0.70 (0.21 - 2.37) <i>p</i> =0.565     |                                                | 0.33 (0.06 - 1.74) <i>p</i> =0.193             | 0.37 (0.08 - 1.82) <i>p</i> =0.222             | 0.21 (0.01 - 5.41) <i>p</i> =0.350             |
| CAD                    | 2.57 (0.28 - 23.64) <i>p</i> =0.405    |                                                | 1.38 (0.20 - 9.40) <i>p</i> =0.739             | 1.38 (0.22 - 8.78) <i>p</i> =0.735             | 1.82 (0.22 - 14.86) <i>p</i> =0.577            |
| Heart Failure          | 1.47 (0.32 - 6.73) <i>p</i> =0.621     |                                                | 0.19 (0.01 - 3.78) <i>p</i> =0.279             | 0.17 (0.01 - 3.61) <i>p</i> =0.254             | 1.24 (0.09 - 17.85) <i>p</i> =0.876            |
| ESRD                   | 9.97** (3.66 - 27.18) <i>p</i> <0.001  |                                                | 20.26** (3.76 - 109.18) <i>p</i> <0.001        | 16.66** (3.12 - 88.85) <i>p</i> =0.001         | 66.22** (7.54 - 581.41) <i>p</i> <0.001        |
| Chronic Kidney Disease | 3.72** (1.47 - 9.39) <i>p</i> =0.006   |                                                | 5.14* (1.35 - 19.55) <i>p</i> =0.016           | 5.01* (1.27 - 19.76) <i>p</i> =0.021           | 2.74 (0.80 - 9.38) <i>p</i> =0.108             |
| beguanides             | 0.60 (0.18 - 2.03) <i>p</i> =0.411     |                                                |                                                | 0.63 (0.17 - 2.29) <i>p</i> =0.483             | 1.41 (0.24 - 8.24) <i>p</i> =0.703             |
| DPP4-inhibitors        | 1.90 (0.92 - 3.95) <i>p</i> =0.084     |                                                |                                                | 1.44 (0.57 - 3.64) <i>p</i> =0.447             | 2.46 (0.86 - 7.06) <i>p</i> =0.094             |
| insulin                | 1.00 (0.49 - 2.04) <i>p</i> =0.993     |                                                |                                                | 1.22 (0.55 - 2.70) <i>p</i> =0.626             | 1.62 (0.58 - 4.54) <i>p</i> =0.360             |
| ACE inhibitors         | 0.61 (0.27 - 1.37) <i>p</i> =0.230     |                                                |                                                | 0.54 (0.19 - 1.52) <i>p</i> =0.245             | 0.40 (0.13 - 1.25) <i>p</i> =0.115             |
| Statins                | 1.73 (0.87 - 3.45) <i>p</i> =0.118     |                                                |                                                | 1.47 (0.58 - 3.72) <i>p</i> =0.416             | 1.44 (0.50 - 4.12) <i>p</i> =0.499             |
| Heparin                | 13.85** (3.28 - 58.46) <i>p</i> <0.001 |                                                |                                                |                                                | 14.48* (1.45 - 144.34) <i>p</i> =0.023         |
| E0xaparin              | 0.65 (0.33 - 1.27) <i>p</i> =0.207     |                                                |                                                |                                                | 1.00 (0.31 - 3.20) <i>p</i> =0.995             |
| Apixaban               | 3.67** (1.53 - 8.82) <i>p</i> =0.004   |                                                |                                                |                                                | 0.92 (0.23 - 3.71) <i>p</i> =0.902             |
| Steroids               | 12.05** (5.68 - 25.53) <i>p</i> <0.001 |                                                |                                                |                                                | 15.94** (4.80 - 52.93) <i>p</i> <0.001         |
| Tocilizumab            | 8.81** (2.88 - 27.00) <i>p</i> <0.001  |                                                |                                                |                                                | 2.59 (0.34 - 19.54) <i>p</i> =0.355            |
| Remdesivir             | 3.43 (0.35 - 33.93) <i>p</i> =0.291    |                                                |                                                |                                                | 0.50 (0.04 - 7.06) <i>p</i> =0.608             |
| Convalescent Plasma    | 10.10** (3.20 - 31.89) <i>p</i> <0.001 |                                                |                                                |                                                | 3.57 (0.47 - 27.19) <i>p</i> =0.219            |
| Cefepime               | 4.29** (2.07 - 8.88) <i>p</i> <0.001   |                                                |                                                |                                                | 3.01* (1.05 - 8.62) <i>p</i> =0.041            |
